# Supplementary material for: Role and Evolution of the Extracellular Matrix in the Acquisition of Complex Multicellularity in Eukaryotes: A Macroalgal Perspective
Source: MDPI journal article supplement (doi:10.3390/genes12071059), 2021-07-10
Supplement: s1 [file s1]

Supplementary Table S2. Correlation between the sulfated fucan content of isolated cell walls of brown algae and their position in the intertidal zone. Data values corresponding to Figure 4. Height was measured relative to the lowest astronomical tide. CEC, Cation Exchange Capacity. Adapted from [12, 100, 101].

| <b>Species</b>         | <b>Height<br/>(m)</b> | <b>Max.<br/>emersion<br/>(% time)</b> | <b>fucose<br/>content<br/>(% w/w)</b> | <b>SO4<br/>content<br/>(% w/w)</b> | <b>CEC<br/>(meq.g<sup>-1</sup> ms)</b> |
|------------------------|-----------------------|---------------------------------------|---------------------------------------|------------------------------------|----------------------------------------|
| <i>P. canaliculata</i> | 7.3                   | 100                                   | 19.6                                  | 15.4                               | 3.9                                    |
| <i>F. spiralis</i>     | 6.1                   | 75                                    | 12.3                                  | 9.0                                | 3.4                                    |
| <i>F. ceranoides</i>   | 5.4                   | 62                                    | 13.3                                  | 9.3                                | 3.2                                    |
| <i>F. vesiculosus</i>  | 4.8                   | 50                                    | 10.5                                  | 6.4                                | 3.3                                    |
| <i>A. nodosum</i>      | 4.8                   | 50                                    | 9.9                                   | 6.1                                | 3.6                                    |
| <i>F. serratus</i>     | 2.3                   | 33                                    | 6.0                                   | 3.7                                | 3.1                                    |
| <i>B. bifurcata</i>    | 1.8                   | 28                                    | 8.4                                   | 4.4                                | 3.1                                    |
| <i>L. digitata</i>     | 0.5                   | 15                                    | 1.6                                   | 1.7                                | 3.8                                    |
