# Supplementary figures and images for: Role and Evolution of the Extracellular Matrix in the Acquisition of Complex Multicellularity in Eukaryotes: A Macroalgal Perspective
Source: MDPI journal article supplement (doi:10.3390/genes12071059), 2021-07-10

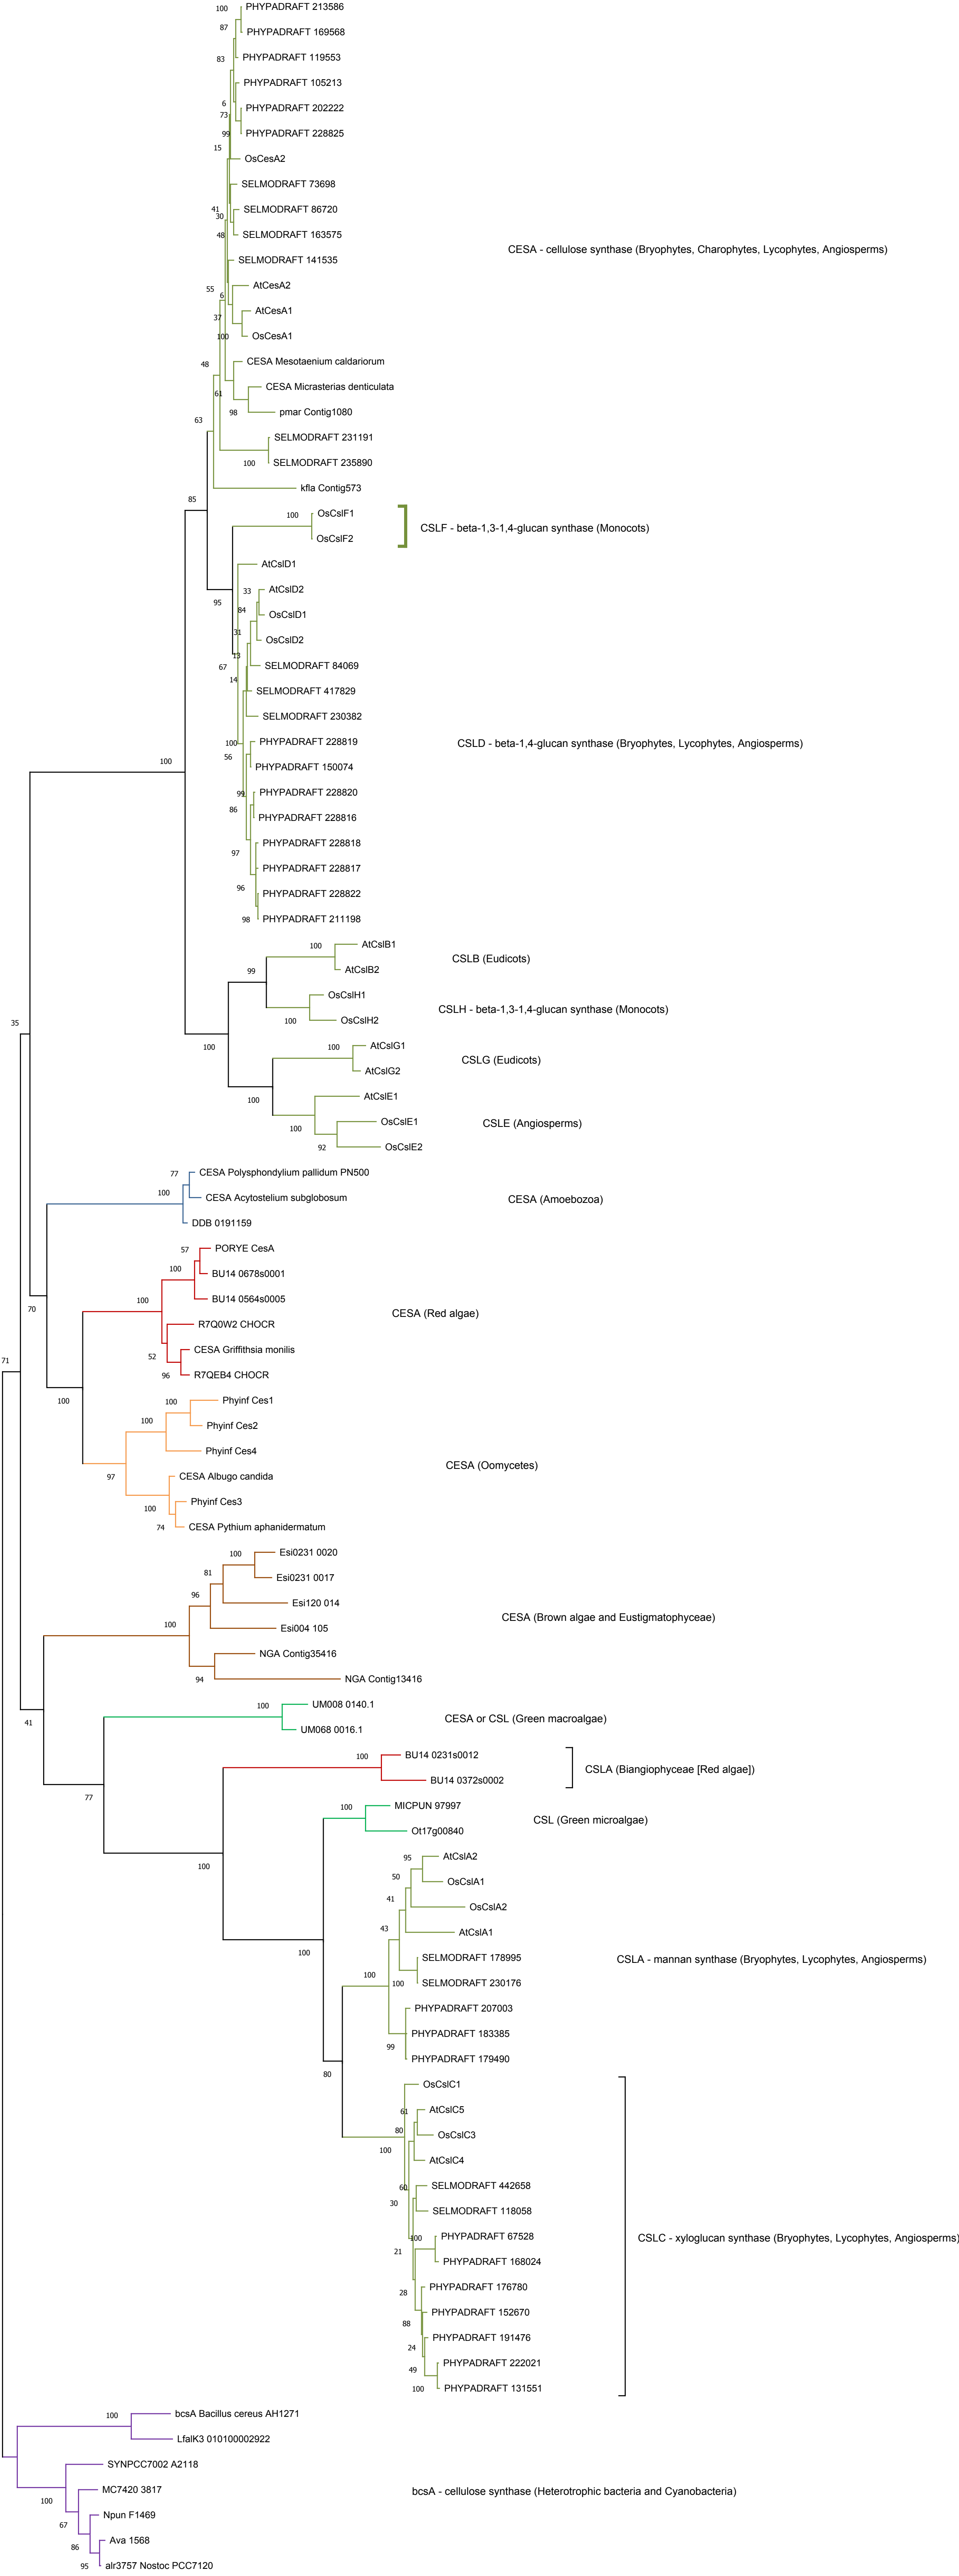

Supplement: s1 [file s1]

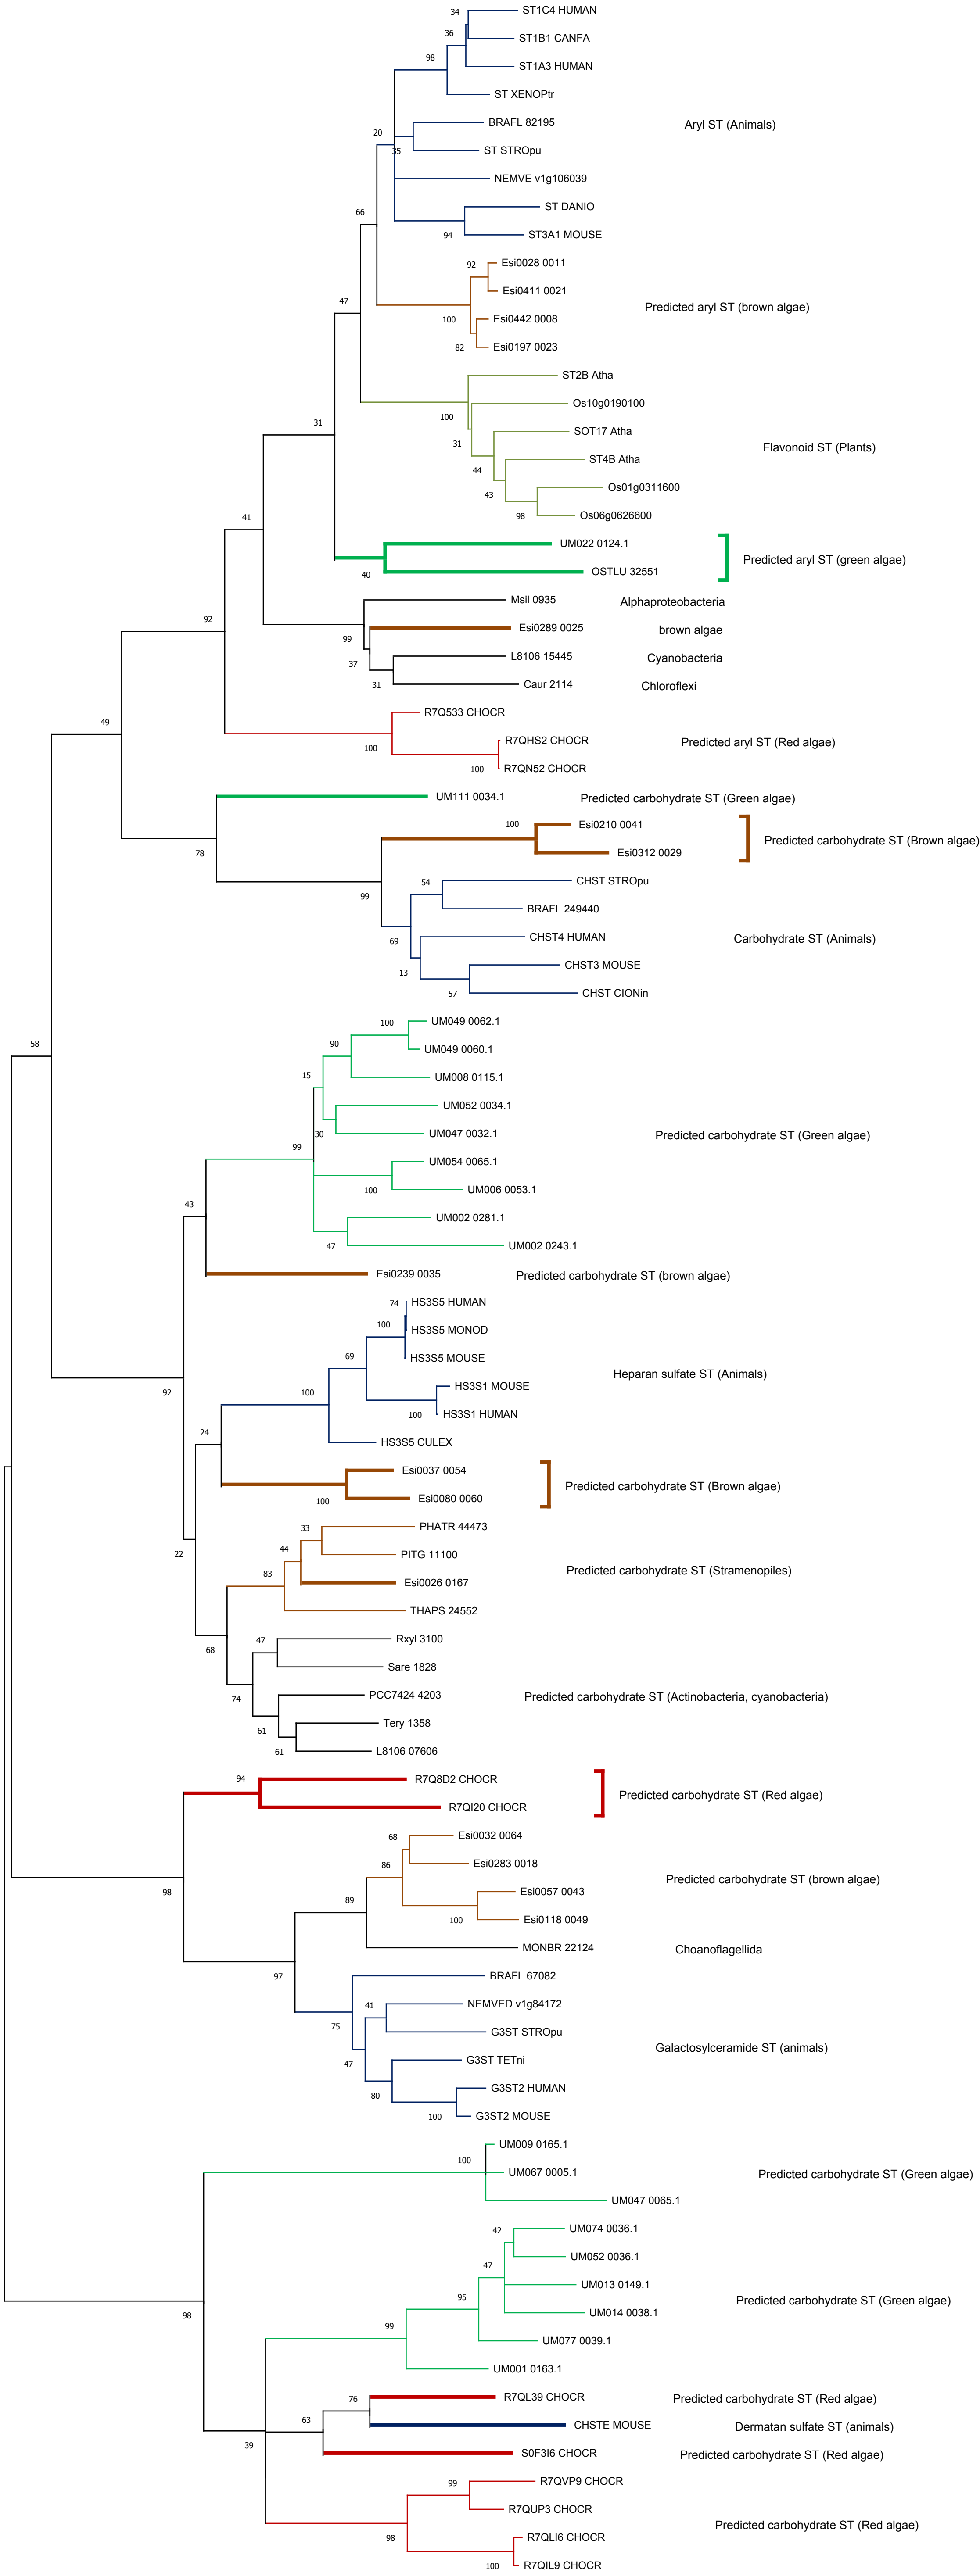

Supplement: s1 [file s1]
